# Supplementary material for: Ablation rate after radioactive iodine therapy in patients with differentiated thyroid cancer at intermediate or high risk of recurrence: a systematic review and a meta-analysis
Source: PubMed Central journal article supplement (PMC8566414; doi:10.1007/s00259-021-05440-x), 2021-06-18

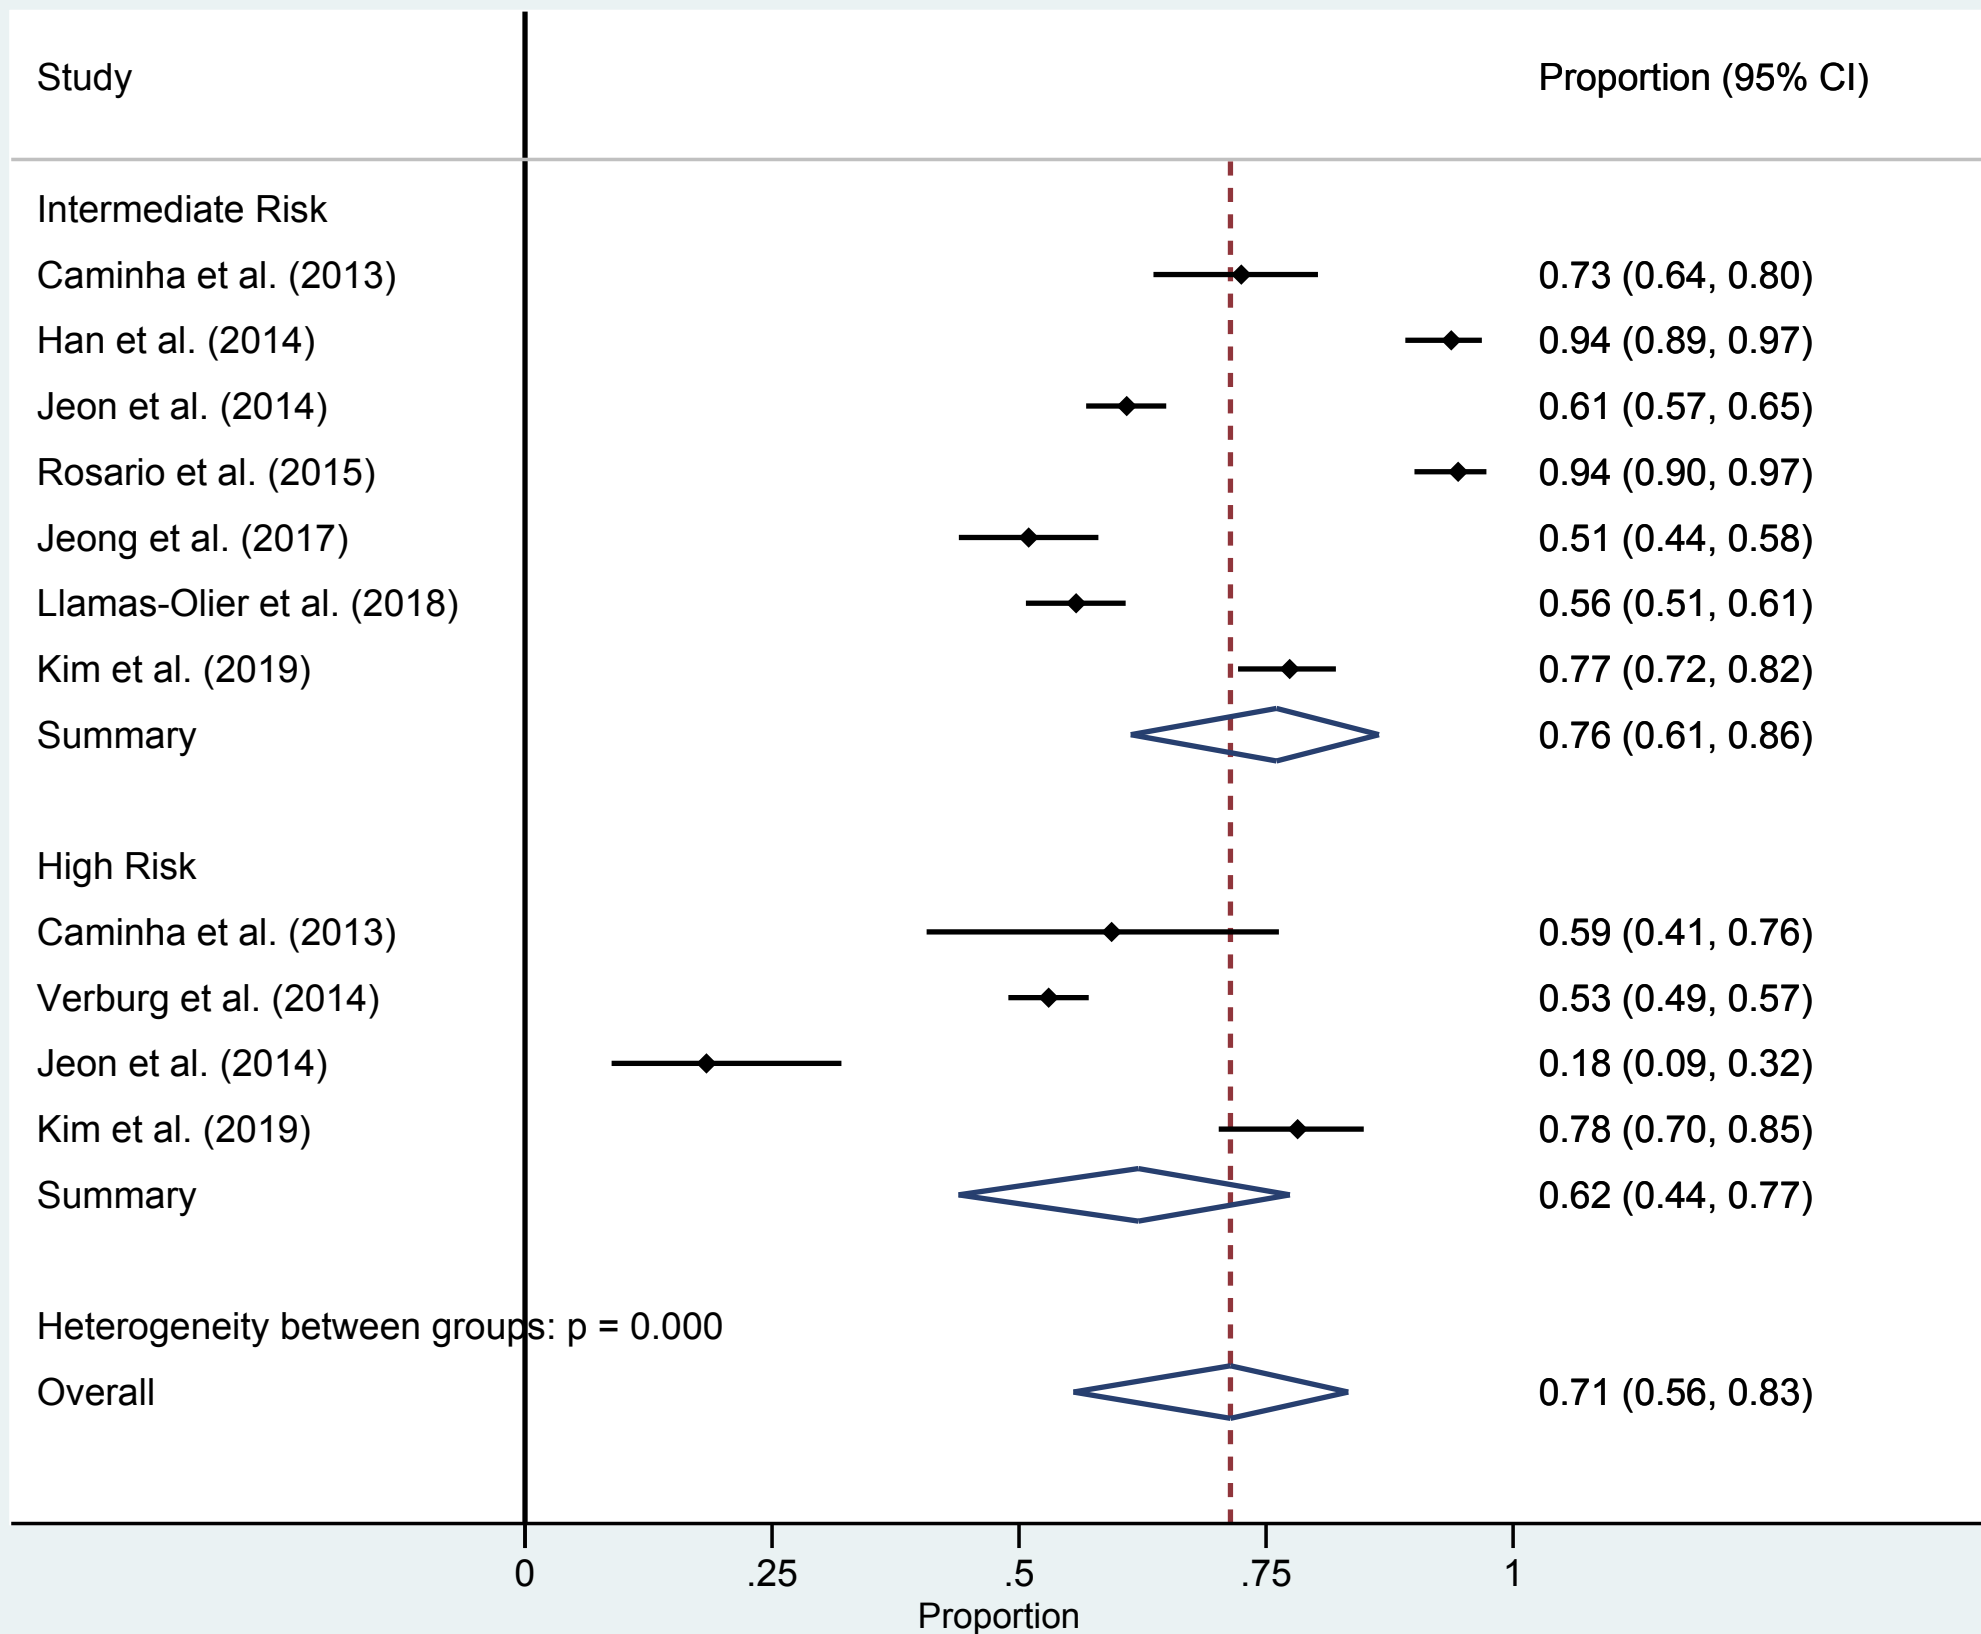

Supplement: 259_2021_5440_MOESM3_ESM.pdf [file 259_2021_5440_MOESM3_ESM.pdf]
